May 2014

# PSYCHIATRIC SERVICES

A Journal of the  
American Psychiatric  
Association

- ◆ Behavioral Management for Children and Adolescents: Assessing the Evidence Base
- ◆ Trauma-Focused CBT for Children and Adolescents: A Review of the Literature
- ◆ Improving Engagement in Programs for Patients With First-Episode Psychosis
- ◆ Do Psychotherapy's Effects Differ by Racial Group? A Metaregression Analysis

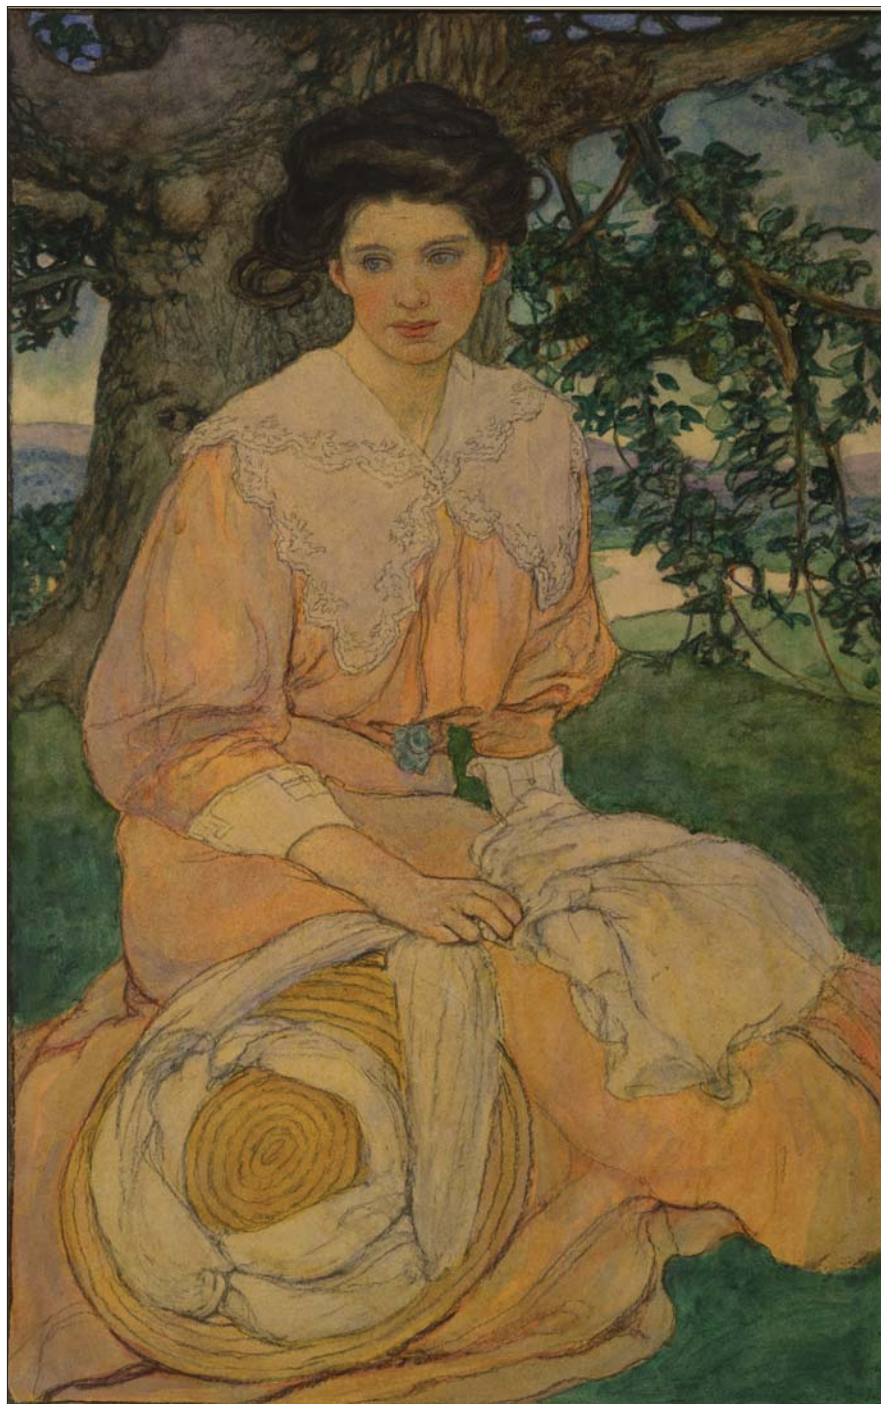

Source: https://psychiatryonline.org/doi/suppl/10.1176/ps.2014.65.issue-5/suppl_file/cover.pdf
